# Supplementary material
Source: PubMed Central journal article supplement (PMC6286686)
Supplement: NIHMS979639-supplement-1.pdf [file NIHMS979639-supplement-1.pdf]

# Aspirin

## Total Nasal Symptoms Score (TNSS) Worksheet

Participant ID:  
Participant Initials:  
Visit Date:  
Visit:  
Coordinator ID:

Test each nostril for stuffiness. Place finger to block end of right nostril. Try to breathe through the left nostril and determine severity of blockage/congestion. Then Repeat process to evaluate right nostril.

|                                     | None                       | A Little                   | Moderate                   | Quite a bit                | Severe                     | Very Severe                |
|-------------------------------------|----------------------------|----------------------------|----------------------------|----------------------------|----------------------------|----------------------------|
| 1. Nasal Congestion (Left nostril)  | <input type="checkbox"/> 0 | <input type="checkbox"/> 1 | <input type="checkbox"/> 2 | <input type="checkbox"/> 3 | <input type="checkbox"/> 4 | <input type="checkbox"/> 5 |
| 2. Nasal Congestion (Right nostril) | <input type="checkbox"/> 0 | <input type="checkbox"/> 1 | <input type="checkbox"/> 2 | <input type="checkbox"/> 3 | <input type="checkbox"/> 4 | <input type="checkbox"/> 5 |
| 3. Runny Nose                       | <input type="checkbox"/> 0 | <input type="checkbox"/> 1 | <input type="checkbox"/> 2 | <input type="checkbox"/> 3 | <input type="checkbox"/> 4 | <input type="checkbox"/> 5 |
| 4. Itchy Nose                       | <input type="checkbox"/> 0 | <input type="checkbox"/> 1 | <input type="checkbox"/> 2 | <input type="checkbox"/> 3 | <input type="checkbox"/> 4 | <input type="checkbox"/> 5 |
| 5. Sneezing                         | <input type="checkbox"/> 0 | <input type="checkbox"/> 1 | <input type="checkbox"/> 2 | <input type="checkbox"/> 3 | <input type="checkbox"/> 4 | <input type="checkbox"/> 5 |
| 6. Itchy Eyes                       | <input type="checkbox"/> 0 | <input type="checkbox"/> 1 | <input type="checkbox"/> 2 | <input type="checkbox"/> 3 | <input type="checkbox"/> 4 | <input type="checkbox"/> 5 |
| 7. Teary Eyes                       | <input type="checkbox"/> 0 | <input type="checkbox"/> 1 | <input type="checkbox"/> 2 | <input type="checkbox"/> 3 | <input type="checkbox"/> 4 | <input type="checkbox"/> 5 |
| 8. Itchy Ears or Throat             | <input type="checkbox"/> 0 | <input type="checkbox"/> 1 | <input type="checkbox"/> 2 | <input type="checkbox"/> 3 | <input type="checkbox"/> 4 | <input type="checkbox"/> 5 |
| 9. Eye Redness                      | <input type="checkbox"/> 0 | <input type="checkbox"/> 1 | <input type="checkbox"/> 2 | <input type="checkbox"/> 3 | <input type="checkbox"/> 4 | <input type="checkbox"/> 5 |
| 10. Total Score _____               |                            |                            |                            |                            |                            |                            |

Participant Initials: \_\_\_\_\_

Date: \_\_\_\_/\_\_\_\_/20\_\_\_\_

Time \_\_\_\_:\_\_\_\_

**Supplemental FIG. E1.** Total Nasal Symptom Score (TNSS) questionnaire. The scores for items 1 and 2 are averaged, so that the final range is between 0-40 points.

$$\text{inverselog}_{10} \left( \frac{(2 - (PrevTNSS - BaselineTNSS)) \times (\log_{10}ProvocDose - \log_{10}PrevDose)}{(MaxTNSS - BaselineTNSS) - (PrevTNSS - BaselineTNSS)} + (\log_{10}PrevDose) \right)$$

- *BaselineTNSS*: The patient's first morning TNSS score, prior to the administration of aspirin.
- *ProvocDose*: The administered dose of aspirin that provoked the reaction (40.5, 81, 162, or 325)
- *PrevDose*: The administered dose of aspirin that was given just previously to the dose of aspirin that provoked the reaction. In all cases, the *PrevDose* is ½ of the *ProvocDose*.
- *PrevTNSS*: The patient's previous TNSS score that was taken after the *PrevDose* was given. For patients whose reaction was induced by the first dose of aspirin (40.5mg), the *PrevTNSS* was the *BaselineTNSS*, as there were no intervening TNSS questionnaires given.
- *MaxTNSS*: The patient's maximum TNSS recorded during the 3-hour observation of reaction. All patients recorded a TNSS at 30-minute intervals during that 3-hour period, and so the *MaxTNSS* is the highest TNSS recorded at one of the following timepoints: Onset of reaction, 30 minutes post onset of reaction, 60 minutes post onset of reaction, 90 minutes post onset of reaction, 120 minutes post onset of reaction, 150 minutes post onset of reaction, 180 minutes post onset of reaction.

**Supplemental FIG. E2.** PD<sub>2</sub> Calculation (provocative dose of aspirin that would cause an increase in TNSS of 2 points during an aspirin challenge).

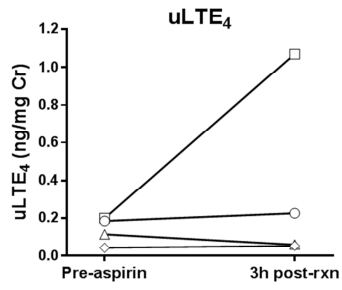

Placebo

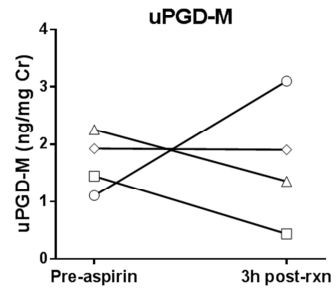

Placebo

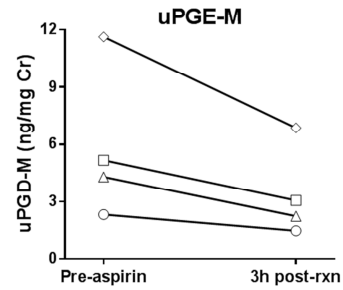

Placebo

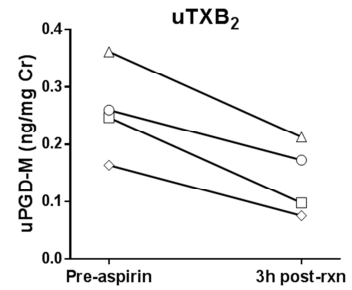

Placebo

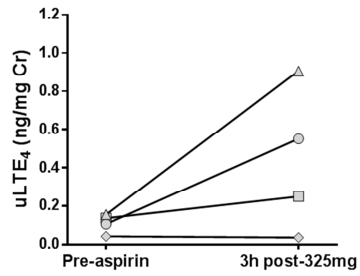

Prasugrel

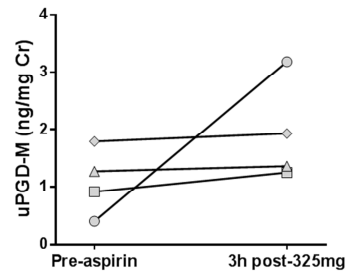

Prasugrel

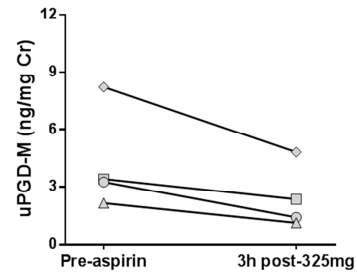

Prasugrel

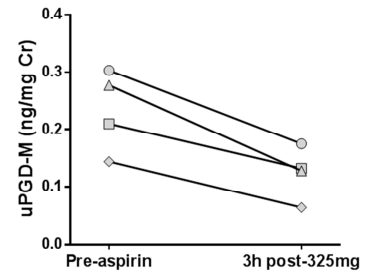

Prasugrel

**Supplemental FIG. E3.** Urinary eicosanoid levels are shown for the 4 prasugrel responders, before and 3 hours after the aspirin-induced reaction on the placebo arm (top row) and before and 3 hours after the 325mg dose of aspirin on the prasugrel arm (bottom row).

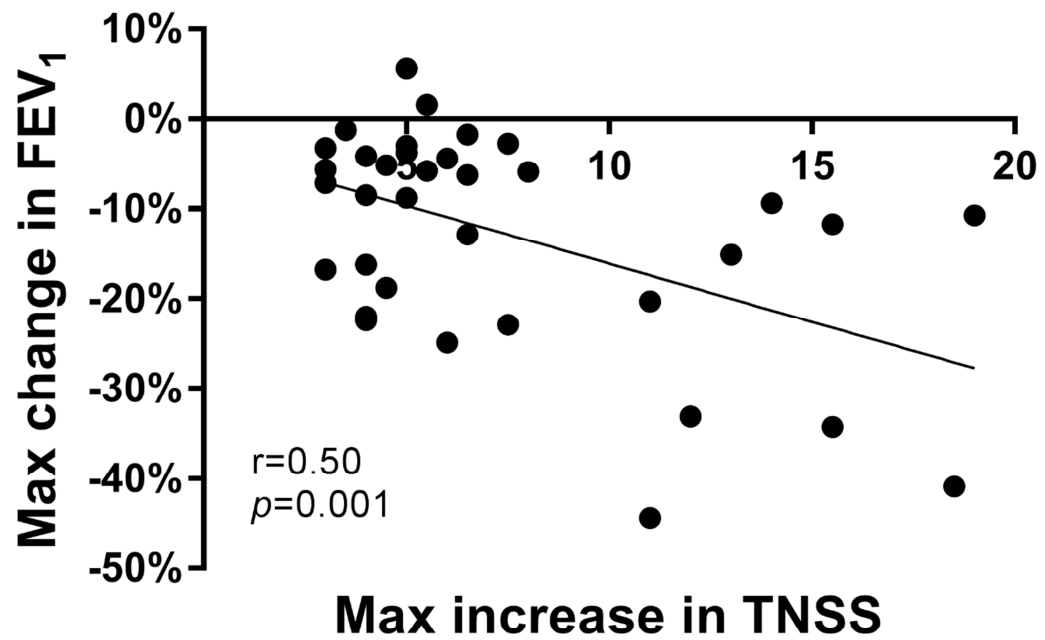

**Supplemental FIG. E4.** Correlation between maximum change in FEV<sub>1</sub> and maximum increase in total nasal symptom score (TNSS) during aspirin-induced reactions on the prasugrel treatment arm is shown.



**Supplemental Table E2.** Results of logistical regression for association between genotype and response to prasugrel for selected SNPs. Genomic position is given relative to the reference human genome (GRCh37/hg19).

| SNP        | Position  | Location | Alleles | MAF   | Estimate | Std. Error | z value | Pr(> z ) |
|------------|-----------|----------|---------|-------|----------|------------|---------|----------|
| rs6809699  | 151056598 | Exon     | A/C     | 0.143 | 18.467   | 3802.118   | 0.005   | 0.996    |
| rs6785930  | 151056616 | Exon     | G/A     | 0.429 | 0.523    | 0.867      | 0.603   | 0.547    |
| rs2046934  | 151057642 | Intron   | G/A     | 0.130 | 17.467   | 2465.326   | 0.007   | 0.994    |
| rs9848789  | 151058963 | Intron   | C/T     | 0.089 | 0.114    | 1.012      | 0.113   | 0.910    |
| rs7615865  | 151073033 | Intron   | T/C     | 0.214 | 1.105    | 1.144      | 0.966   | 0.334    |
| rs1491978  | 151080070 | Intron   | C/T     | 0.196 | 0.939    | 1.132      | 0.830   | 0.407    |
| rs7634096  | 151087637 | Intron   | C/T     | 0.143 | -0.432   | 1.082      | -0.399  | 0.690    |
| rs7637803  | 151089226 | Intron   | C/T     | 0.125 | -0.256   | 1.060      | -0.242  | 0.809    |
| rs3732765  | 151090424 | Intron   | G/A     | 0.286 | 0.089    | 0.784      | 0.113   | 0.910    |
| rs11708287 | 151090863 | Intron   | A/C     | 0.286 | 0.089    | 0.784      | 0.113   | 0.910    |
| rs9859538  | 151090963 | Intron   | G/A     | 0.339 | 0.285    | 0.679      | 0.420   | 0.674    |
| rs12497065 | 151096112 | Intron   | T/C     | 0.278 | 0.136    | 0.776      | 0.175   | 0.861    |
| rs12497089 | 151096164 | Intron   | T/A     | 0.259 | 0.243    | 0.761      | 0.319   | 0.750    |
| rs17283010 | 151097391 | Intron   | G/A     | 0.278 | 0.136    | 0.776      | 0.175   | 0.861    |
| rs12489121 | 151098519 | Intron   | A/G     | 0.321 | -0.119   | 0.752      | -0.159  | 0.874    |
| rs6787801  | 151099741 | Intron   | A/G     | 0.446 | 0.343    | 0.804      | 0.427   | 0.670    |
| rs9289836  | 151100121 | Intron   | C/T     | 0.339 | 0.285    | 0.679      | 0.420   | 0.674    |
| rs3821663  | 151100677 | Intron   | T/G     | 0.286 | 0.089    | 0.784      | 0.113   | 0.910    |
| rs11713504 | 151100956 | Intron   | A/G     | 0.278 | 0.136    | 0.776      | 0.175   | 0.861    |
| rs10935840 | 151101083 | Intron   | A/G     | 0.278 | 0.136    | 0.776      | 0.175   | 0.861    |
| rs7429509  | 151101167 | Intron   | C/T     | 0.321 | 0.416    | 0.721      | 0.577   | 0.564    |
| rs12488803 | 151101358 | Intron   | T/G     | 0.250 | 0.296    | 0.756      | 0.392   | 0.695    |
| rs10935841 | 151101691 | Intron   | C/T     | 0.286 | 0.089    | 0.784      | 0.113   | 0.910    |
| rs12485508 | 151101746 | Intron   | C/T     | 0.286 | 0.089    | 0.784      | 0.113   | 0.910    |
| rs1491974  | 151102452 | Intron   | A/G     | 0.464 | 0.205    | 0.759      | 0.270   | 0.787    |
| rs4603933  | 151103070 | Upstream | T/G     | 0.125 | 17.403   | 2465.326   | 0.007   | 0.994    |

MAF - minor allele frequency  
Std. Error - standard error

**Supplemental Table E3.** Adverse events.

|                                        | <b>Placebo arm</b> | <b>Prasugrel arm</b> | <b>P-value</b> |
|----------------------------------------|--------------------|----------------------|----------------|
| Total adverse events reported          | 25                 | 36                   |                |
| Bruising                               | 3                  | 12                   | 0.006          |
| Upper respiratory infection/sinusitis  | 5                  | 7                    | 0.75           |
| Worsening of asthma                    | 5                  | 4                    | 1              |
| Muscle injury/myalgia                  | 2                  | 0                    | 0.49           |
| Headache                               | 2                  | 2                    | 0.49           |
| Throat infection                       | 1                  | 1                    | 1              |
| Accidental ingestion of NSAID          | 1                  | 0                    | 1              |
| Systemic reaction to aspirin challenge | 1                  | 0                    | 1              |
| Skin rash                              | 1                  | 1                    | 1              |
| Conjunctivitis                         | 0                  | 1                    | 1              |
| Ear Infection                          | 0                  | 1                    | 1              |
| Finger tingling/Numbness               | 0                  | 1                    | 1              |
| Joint stiffness                        | 0                  | 1                    | 1              |
| Light-headedness                       | 1                  | 0                    | 1              |
| Lower leg edema                        | 0                  | 1                    | 1              |
| Mood change                            | 1                  | 0                    | 1              |
| Spider bite                            | 1                  | 0                    | 1              |
| Stomach pain                           | 1                  | 0                    | 1              |
| Urinary tract infection                | 0                  | 1                    | 1              |
| Viral gastroenteritis                  | 0                  | 1                    | 1              |

All events that occurred after randomization through two weeks after the second aspirin challenge were included. Data listed is number of participants reporting each type of adverse event.

**Supplemental Table E1.** Demographic/clinical and laboratory characteristics of the 5 responders and the 35 non-responders. Clinical and laboratory values are at the pre-aspirin baseline following each of the treatment arms. Data are mean  $\pm$ SE.

|                              | Prasugrel “responders”<br>(n = 5) |                 | Prasugrel<br>“nonresponders”<br>(n = 35) |                 | p-value (responder vs<br>nonresponder) |           |
|------------------------------|-----------------------------------|-----------------|------------------------------------------|-----------------|----------------------------------------|-----------|
|                              | Placebo                           | Prasugrel       | Placebo                                  | Prasugrel       | Placebo                                | Prasugrel |
| Age (y)                      | 44 $\pm$ 4                        |                 | 47 $\pm$ 2                               |                 | 0.946                                  |           |
| Sex (female)                 | 3 of 5                            |                 | 19 of 35                                 |                 | 0.834                                  |           |
| FEV1 (L)                     | 2.74 $\pm$ 0.26                   | 2.74 $\pm$ 0.30 | 3.19 $\pm$ 0.14                          | 3.16 $\pm$ 0.15 | 0.178                                  | 0.258     |
| FEV1 predicted (%)           | 84.5 $\pm$ 5.4                    | 84.0 $\pm$ 6.6  | 93.1 $\pm$ 2.3                           | 92.2 $\pm$ 2.2  | 0.206                                  | 0.294     |
| FeNO (ppb)                   | 39.6 $\pm$ 8.9                    | 39.2 $\pm$ 9.1  | 54.1 $\pm$ 8.4                           | 45.9 $\pm$ 4.7  | 0.258                                  | 0.533     |
| Blood AEC ( $\mu$ L)         | 640 $\pm$ 166                     | 500 $\pm$ 148   | 500 $\pm$ 62                             | 435 $\pm$ 50    | 0.464                                  | 0.696     |
| Blood eosinophils (%)        | 8.4 $\pm$ 1.7                     | 7.2 $\pm$ 1.5   | 7.1 $\pm$ 0.7                            | 6.4 $\pm$ 0.7   | 0.499                                  | 0.619     |
| ACQ-7                        | 0.93 $\pm$ 0.24                   | 0.74 $\pm$ 0.11 | 0.77 $\pm$ 0.38                          | 0.70 $\pm$ 0.11 | 0.495                                  | 0.865     |
| TNSS, baseline               | 2.3 $\pm$ 0.7                     | 5.4 $\pm$ 2.0   | 3.2 $\pm$ 0.7                            | 3.2 $\pm$ 0.6   | 0.342                                  | 0.343     |
| TNSS, max during rxn         | 5.7 $\pm$ 0.7                     | 3.5 $\pm$ 1.2   | 10.8 $\pm$ 1.4                           | 10.6 $\pm$ 0.9  | 0.002                                  | 0.0007    |
| PD <sub>2</sub>              | 82 $\pm$ 18                       | 650             | 78 $\pm$ 18                              | 66 $\pm$ 10     | 0.881                                  |           |
| uLTE <sub>4</sub> (ng/mg Cr) | 0.14 $\pm$ 0.03                   | 0.10 $\pm$ 0.14 | 0.44 $\pm$ 0.13                          | 0.75 $\pm$ 0.28 | 0.041                                  | 0.026     |
| uPGD-M (ng/mg Cr)            | 1.73 $\pm$ 0.20                   | 1.48 $\pm$ 0.45 | 2.37 $\pm$ 0.26                          | 2.54 $\pm$ 0.33 | 0.067                                  | 0.234     |
| uPGE-M (ng/mg Cr)            | 5.36 $\pm$ 1.64                   | 4.31 $\pm$ 1.05 | 7.97 $\pm$ 1.25                          | 6.94 $\pm$ 0.87 | 0.443                                  | 0.264     |
| uTXB <sub>2</sub> (ng/mg Cr) | 0.26 $\pm$ 0.03                   | 0.33 $\pm$ 0.10 | 0.38 $\pm$ 0.03                          | 0.31 $\pm$ 0.02 | 0.022                                  | 0.811     |
